# Supplementary material for: Sustained Release of a Polymeric Wetting Agent from a Silicone-Hydrogel Contact Lens Material
Source: PubMed Central journal article supplement — ACS Omega. 2022 Aug 9;7(33):29223–30. doi: 10.1021/acsomega.2c03310 (PMC9404521; doi:10.1021/acsomega.2c03310), 2022-08-09
Supplement: ao2c03310_si_001.pdf [file ao2c03310_si_001.pdf]

# Sustained Release of Polymeric Wetting Agent from a Silicone Hydrogel Contact Lens Material

Ying Zheng<sup>1</sup>, Jinbo Dou<sup>1</sup>, Yan Wang<sup>1</sup>, Lu Zhu<sup>1</sup>, George Yao<sup>1,2</sup>, Young Hyun Kim<sup>1,3,4</sup>,  
Clayton J. Radke<sup>3,4</sup>, James Yuliang Wu<sup>1,2\*</sup>

<sup>1</sup> Alcon Research LLC, 11460 Johns Creek Parkway, Duluth, GA, 30097

<sup>2</sup> Alcon Research LLC, 6201 South Freeway, Fort Worth, TX, 76134

<sup>3</sup> Chemical and Biomolecular Engineering Department, University of California, Berkeley,  
California, 94720, United States

<sup>4</sup> Herbert Wertheim School of Optometry & Vision Science, University of California, Berkeley,  
CA, 94720, United States

Submitted to:  
ACS Omega  
May 27th, 2022

Revision Submitted:  
June 20<sup>th</sup>, 2022

Revision 2 Submitted:  
July 25<sup>th</sup>, 2022

Declaration of Interest: Y.Z., J.D., Y.W., L.Z. G.Y., Y.H.K. and J.Y.W. are employees of Alcon Research LLC. The authors declare no competing financial interest.

Funding: This work was funded by Alcon Research, LLC.

Word Count: 3923

Scheme: 1

Tables: 1

Figures: 6

Supporting Information: 1 Figure and 1 Table

\*Corresponding Author:

James Yuliang Wu

Alcon Research, LLC, 6201 South Freeway, Fort Worth, Texas 76134, United States

Email: [james.wu@alcon.com](mailto:james.wu@alcon.com)

Phone: +1(817)-615-2673

**Supporting Information:**

Figure S1 gives the calibration curve between fluorescence intensity and poly(oxyethylene)-*co*-poly(oxybutylene) concentration, determined for the fluorescence plate-reader method.

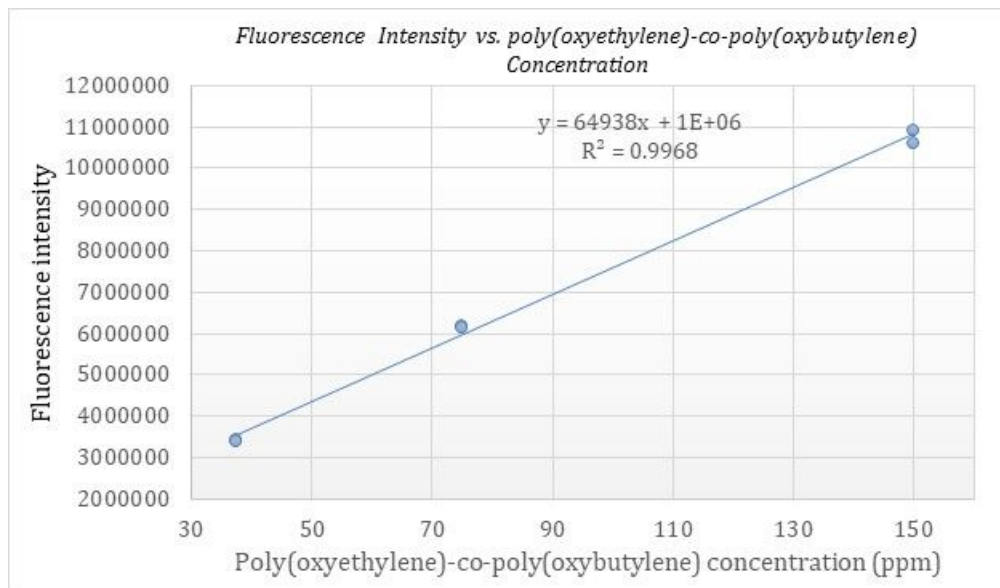

**Figure S1.** Linear calibration curve of fluorescently tagged poly(oxyethylene)-*co*-poly(oxybutylene) concentration vs. fluorescence intensity from the plate reader method.

Table S1 lists the fluorescence-imaging raw data for the poly(oxyethylene)-*co*-poly(oxybutylene)-loaded lenses and the equilibrium solution, as well as the calculated partition coefficient.

**Table S1.** Loading partition coefficient obtained from fluorescence imaging

| Fluorescence Intensity                                                                         | Direct Reading (AU) | After subtraction of PBS background (AU) |
|------------------------------------------------------------------------------------------------|---------------------|------------------------------------------|
| Lens 1                                                                                         | 14673               | 14278                                    |
| Lens 2                                                                                         | 13780               | 13380                                    |
| Lens 3                                                                                         | 13776               | 13385                                    |
| <b>Ave Lens</b>                                                                                | <b>14035 ± 507</b>  | <b>13639 ± 517</b>                       |
| PBS background                                                                                 | 395 ± 1             | N/A                                      |
| 150 ppm poly(oxyethylene)- <i>co</i> -poly(oxybutylene) solution                               | 423 ± 2             | <b>27 ± 1</b>                            |
| $k = \text{Lens intensity} / \text{poly(oxyethylene)-co-poly(oxybutylene) solution intensity}$ | N/A                 | <b>505 ± 23</b>                          |
